# Supplementary material for: Experimental and theoretical investigation on the charge storage performance of NiSb2O6 and its reduced graphene oxide composite – a comparative analysis
Source: Royal Society of Chemistry journal article supplement (doi:10.1039/d4cp03249g), 2024-01-01
Supplement: d4cp03249g1.pdf [file d4cp03249g1.pdf]

## Supplementary Information

### Experimental and Theoretical investigation on charge storage performance of NiSb<sub>2</sub>O<sub>6</sub> and its reduced graphene oxide composite – A Comparative analysis

Parul<sup>1</sup>, Surjit Sahoo<sup>2</sup>, Satyajit Ratha<sup>1</sup>, Gopal Sanyal<sup>3</sup>, Brahmananda Chakraborty<sup>4,5\*</sup> Saroj  
Kumar Nayak<sup>1\*</sup>

<sup>1</sup>Indian Institute of Technology Bhubaneswar, Argul, Jatani, Khordha, Odisha-  
752050, India

<sup>2</sup>Department of Mechanical Engineering, Indian Institute of Technology Jammu, Jammu  
181221, India

<sup>3</sup>Technology Transfer and Collaboration Division, Bhabha Atomic Research Centre,  
Trombay, Mumbai-400085, India

<sup>4</sup>High Pressure & Synchrotron Radiation Physics Division, Bhabha Atomic Research Centre,  
Trombay, Mumbai-400085, India

<sup>5</sup>Homi Bhabha National Institute, Mumbai-400094, India

\*Email address: [nayaks@iitbbs.ac.in](mailto:nayaks@iitbbs.ac.in), [brahma@barc.gov.in](mailto:brahma@barc.gov.in)

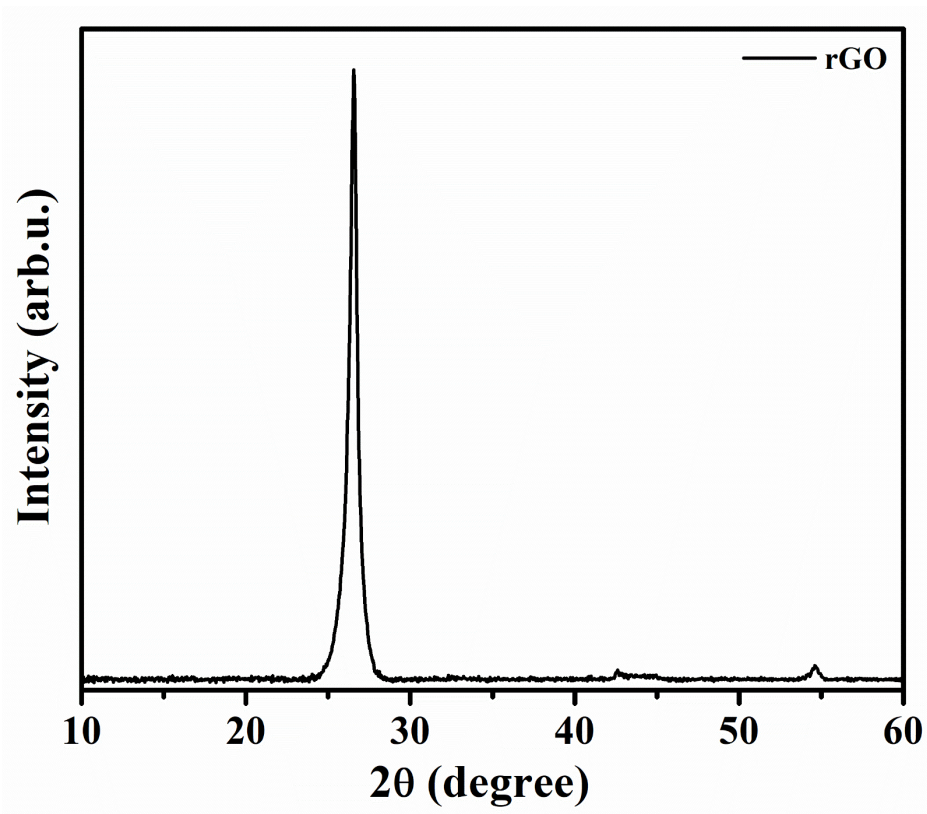

**Figure S1** XRD pattern for reduced graphene oxide sample, showing a Bragg peak at  $\sim 26.77^\circ$ .

The low-intensity peak is found in the composite sample due to the extremely high-intensity peaks of the  $\text{NiSb}_2\text{O}_6$  sample.

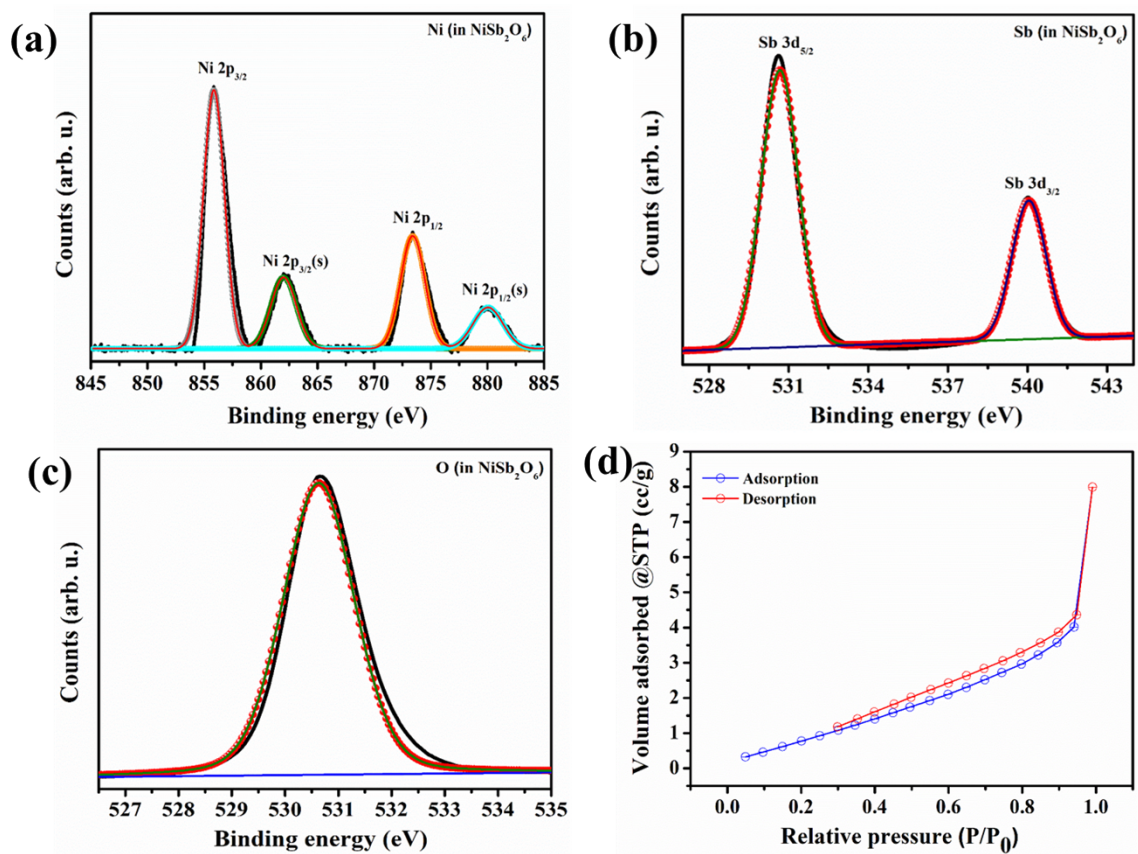

**Figure S2** XPS high-resolution spectra for (a) Ni 2p, (b) Sb 3d, (c) O 1s in case of bare  $\text{NiSb}_2\text{O}_6$ , (d) BET isotherm of bare  $\text{NiSb}_2\text{O}_6$ .

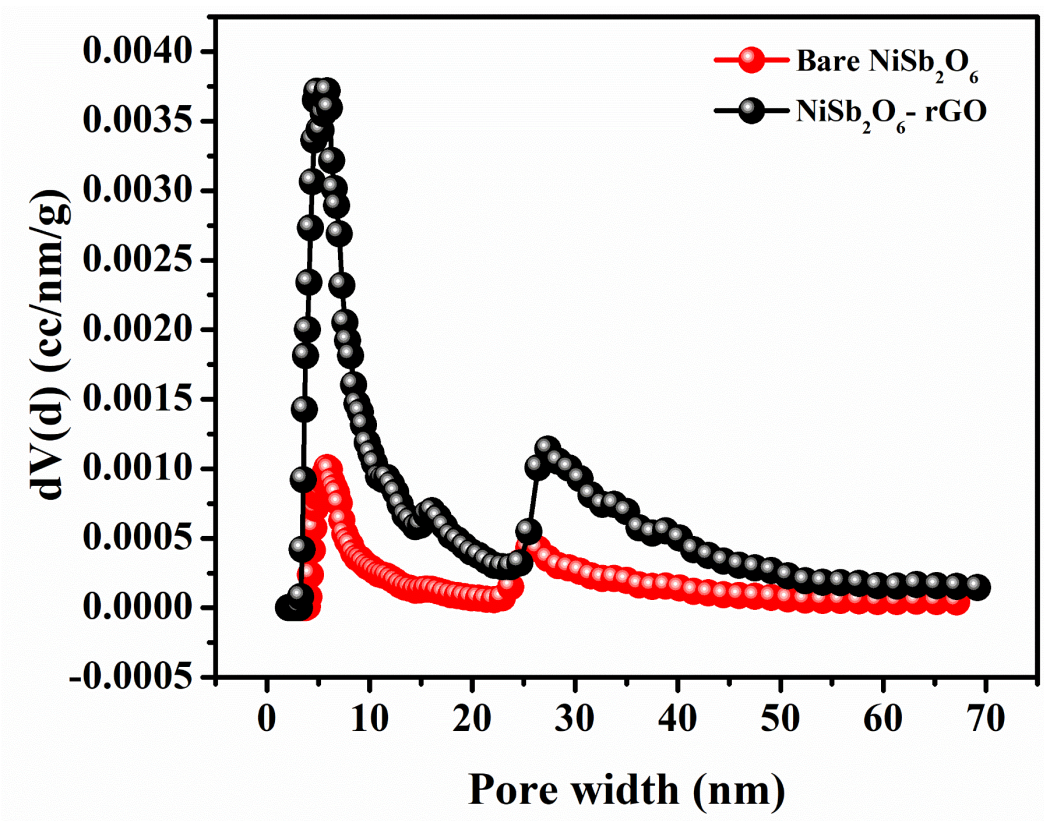

**Figure S3** Pore size distribution curve for bare NiSb<sub>2</sub>O<sub>6</sub> and NiSb<sub>2</sub>O<sub>6</sub>-reduced graphene oxide composite.

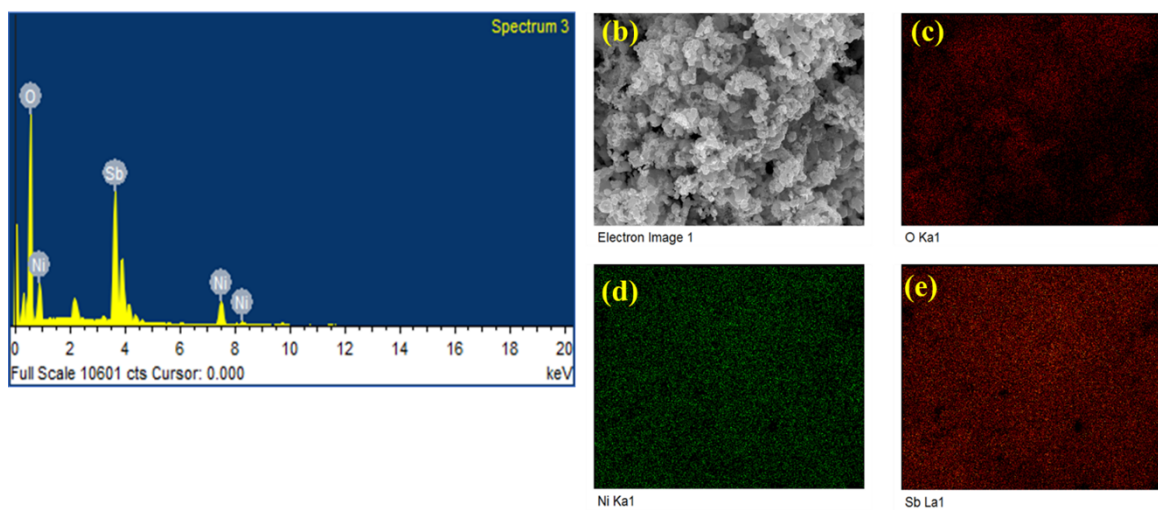

**Figure S4** (a) The EDS spectrum  $\text{NiSb}_2\text{O}_6$ , (b) FE-SEM micrograph for elemental mapping of  $\text{NiSb}_2\text{O}_6$ , (c) oxygen, (d) nickel, (e) antimony.

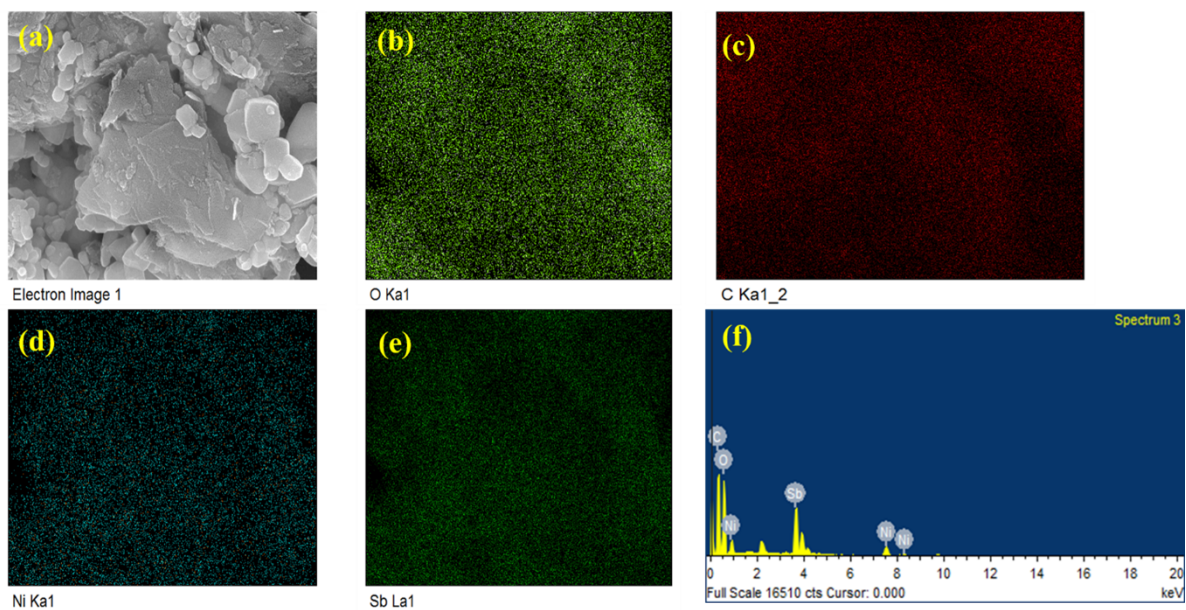

**Figure S5** (a) FE-SEM micrograph for elemental mapping of  $\text{NiSb}_2\text{O}_6$ , (b) oxygen, (c) carbon, (d) nickel, and (e) antimony, (f) The EDX spectrum  $\text{NiSb}_2\text{O}_6$ -reduced graphene oxide composite.

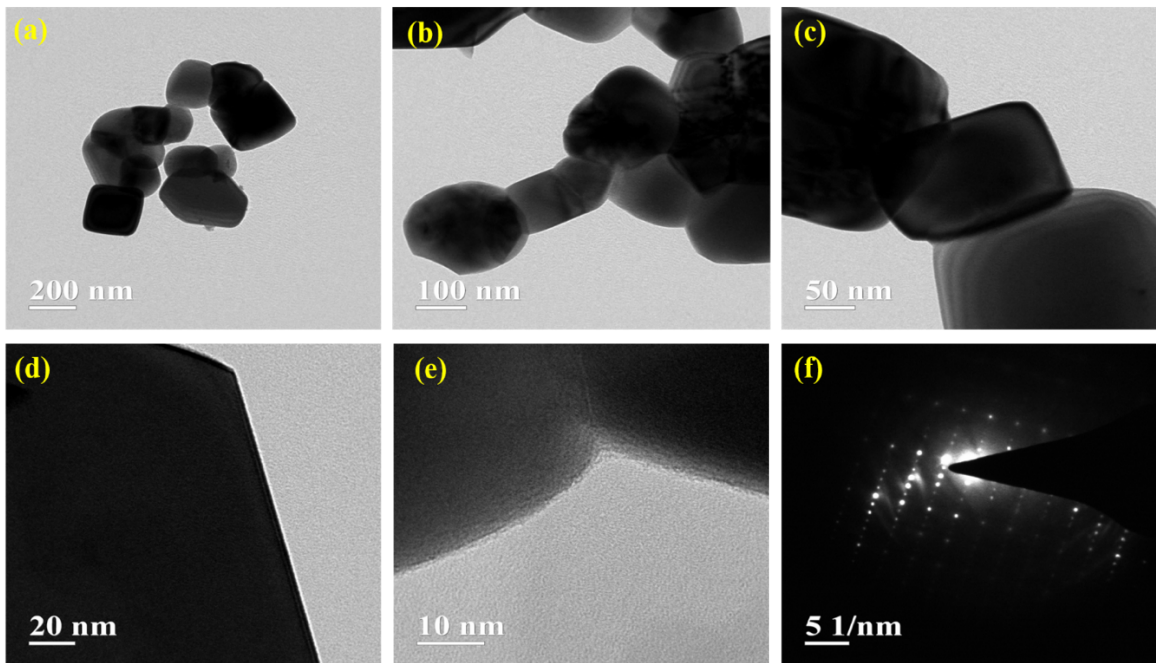

**Figure S6** HR-TEM micrographs of NiSb<sub>2</sub>O<sub>6</sub> different magnifications (a) 200 nm, (b) 100 nm, (c) 50 nm, (d) 20 nm (e)10 nm (d) SAED pattern of NiSb<sub>2</sub>O<sub>6</sub>

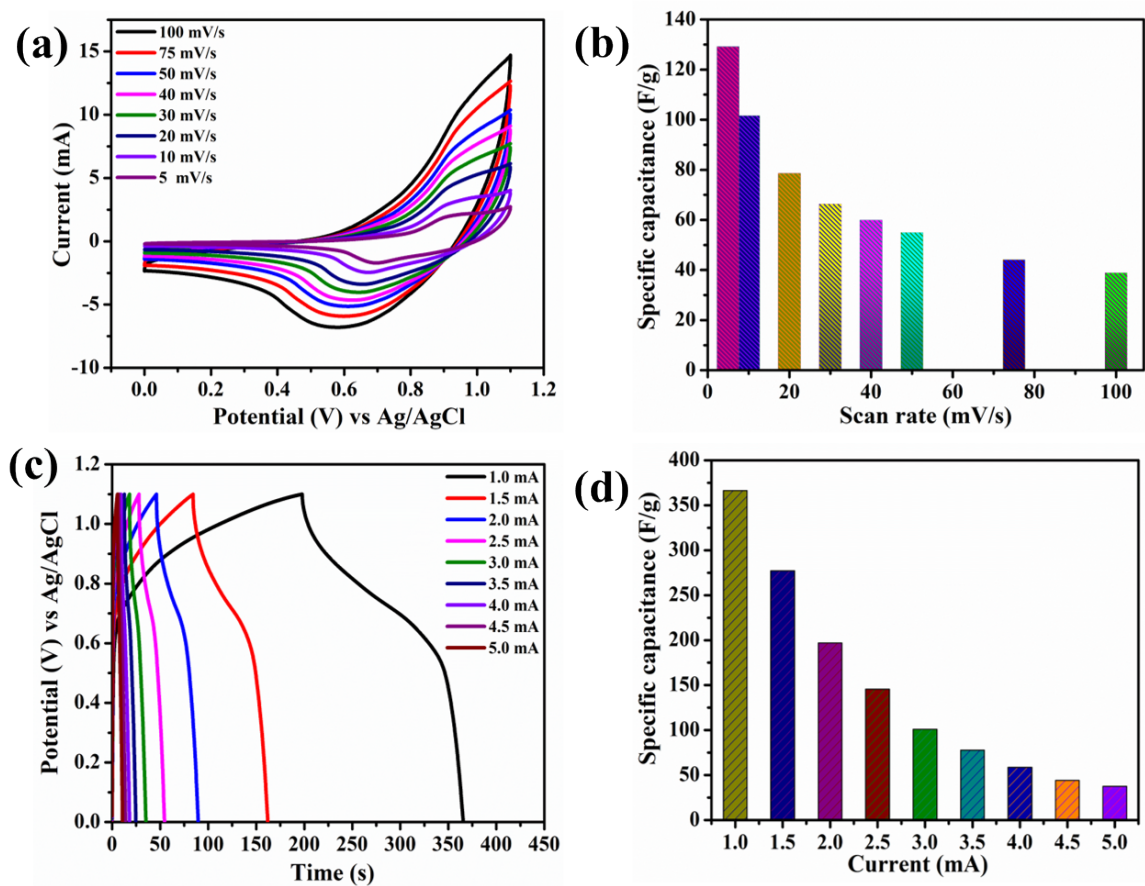

**Figure S7** Electrochemical analysis of NiSb<sub>2</sub>O<sub>6</sub> electrode. (a) CV plots of NiSb<sub>2</sub>O<sub>6</sub> electrode at various scan rates 5 – 100 mV s<sup>-1</sup>, (b) effect of scan rates on specific capacitances of NiSb<sub>2</sub>O<sub>6</sub> electrode, (c) CD plots of NiSb<sub>2</sub>O<sub>6</sub> electrode at various applied currents and (d) effect of various current values on specific capacitances of NiSb<sub>2</sub>O<sub>6</sub> electrode.



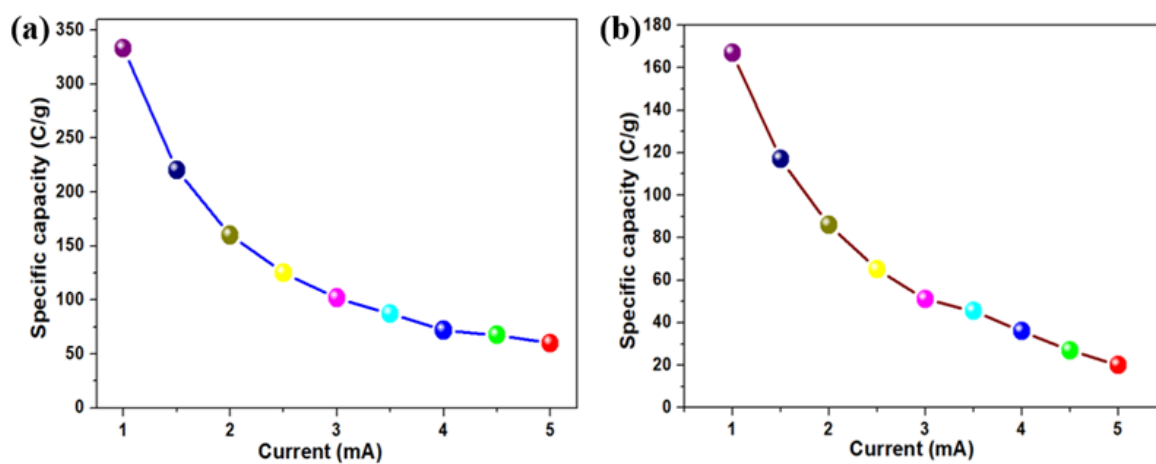

**Figure S8** The specific capacity vs. applied current plot for (a) NiSb<sub>2</sub>O<sub>6</sub>-rGO composite electrode and (b) bare NiSb<sub>2</sub>O<sub>6</sub> electrode.

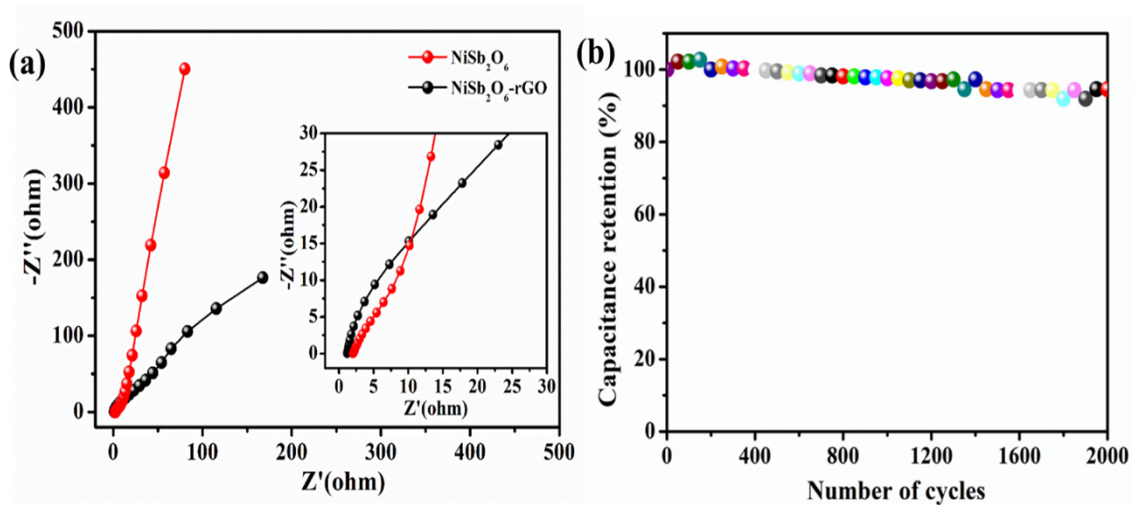

**Figure S9** (a) Nyquist plots comparison for  $\text{NiSb}_2\text{O}_6$  and  $\text{NiSb}_2\text{O}_6$ -reduced graphene oxide composite electrode, with inset shows the enlarged portion of Nyquist plots  $\text{NiSb}_2\text{O}_6$  and  $\text{NiSb}_2\text{O}_6$ -reduced graphene oxide composite electrode, (b) cyclic stability of  $\text{NiSb}_2\text{O}_6$ -reduced graphene oxide composite electrode over 2000 cycles.

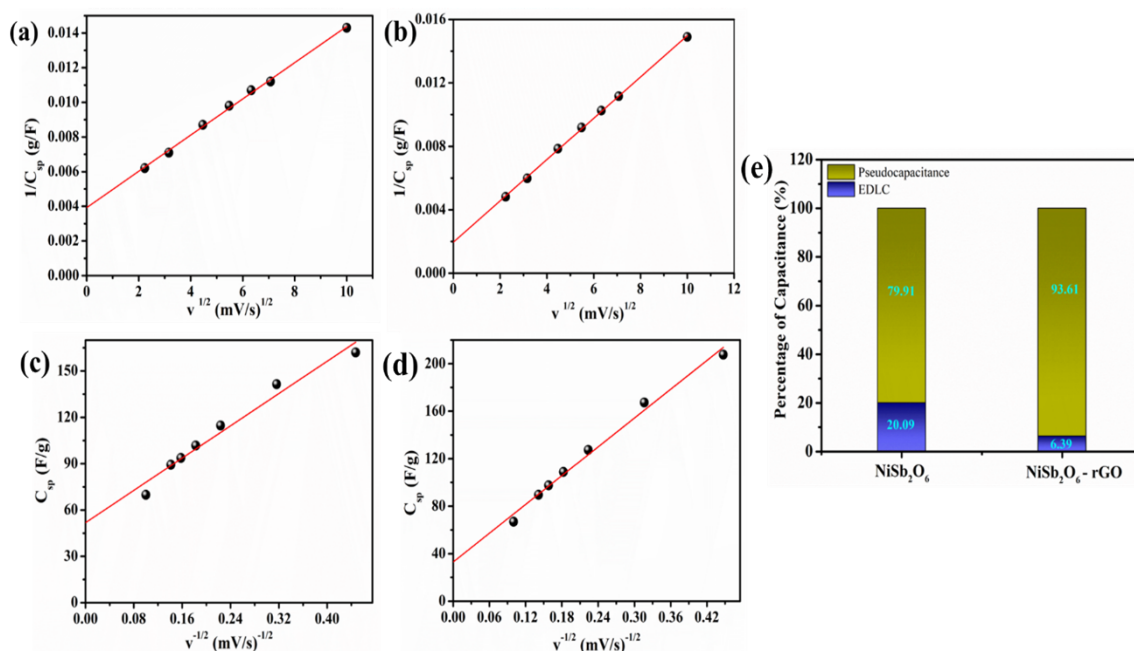

**Figure S10** Trasatti plots NiSb<sub>2</sub>O<sub>6</sub> and NiSb<sub>2</sub>O<sub>6</sub>-reduced graphene oxide electrode. The relationship between  $1 / C_{sp}$  and  $v_{1/2}$  is examined for two types of electrodes: (a) bare NiSb<sub>2</sub>O<sub>6</sub> electrode and (b) NiSb<sub>2</sub>O<sub>6</sub>-reduced graphene oxide composite electrode. The relationship between  $C_{sp}$  and  $v^{-1/2}$  is examined for two different electrodes: (c) bare NiSb<sub>2</sub>O<sub>6</sub> electrode and (d) NiSb<sub>2</sub>O<sub>6</sub>-reduced graphene oxide composite electrode. These electrodes are tested in Na<sub>2</sub>SO<sub>4</sub> electrolyte. (e) The study investigates the contribution of EDLC and pseudocapacitance in the NiSb<sub>2</sub>O<sub>6</sub> electrode and the NiSb<sub>2</sub>O<sub>6</sub>-reduced graphene oxide composite electrode.

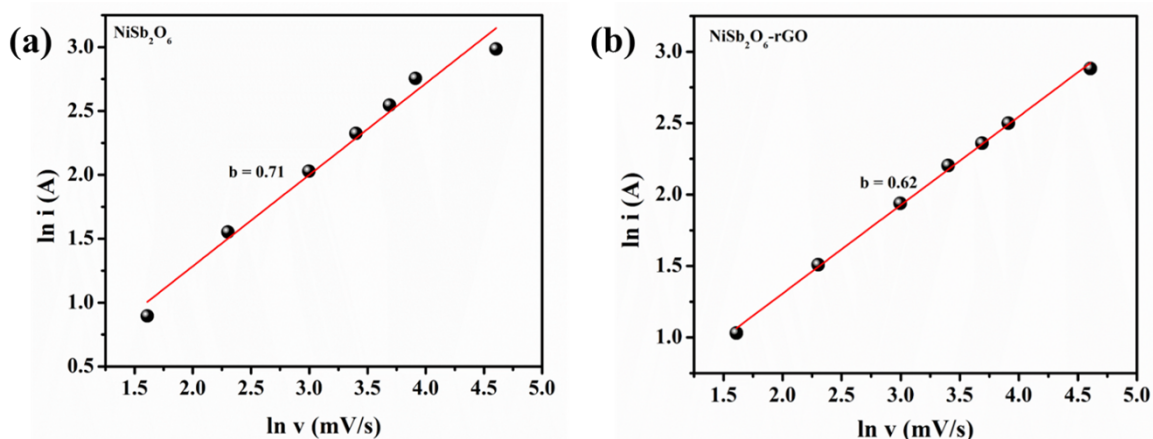

**Figure S11** Differentiating the device's nature can be determined by calculating the  $b$  parameter using the power law equation. This parameter represents the slope of the linear relationship between the  $\ln$  of the current and the  $\ln$  of the scan rate for (a)  $\text{NiSb}_2\text{O}_6$  and (b)  $\text{NiSb}_2\text{O}_6$ -reduced graphene oxide composite electrode.

### Three-electrode measurement results for $\text{NiSb}_2\text{O}_6$ -rGO composite electrodes with 90:10 and 85:15 ratios;

**Figure S12(a)** shows the cyclic voltammetry curve for the  $\text{NiSb}_2\text{O}_6$ -rGO (90:10) at the different scan rates varying from 5 mV/s to 100 mV/s. **Figure S12(b)** represents the plot for the effect of specific capacitance on scan rates. The maximum specific capacitance of about 357.64 F/g is obtained at a scan rate of 5 mV/s. **Figure S12(c)** shows the charge-discharge profile for the  $\text{NiSb}_2\text{O}_6$ -rGO (90:10) at different applied current values (from 1 mA to 5 mA). A maximum specific capacitance of about 1088.6 F/g at the current density of 1 A/g is obtained for the  $\text{NiSb}_2\text{O}_6$ -rGO (90:10) electrode as shown in **Figure S12(d)**.

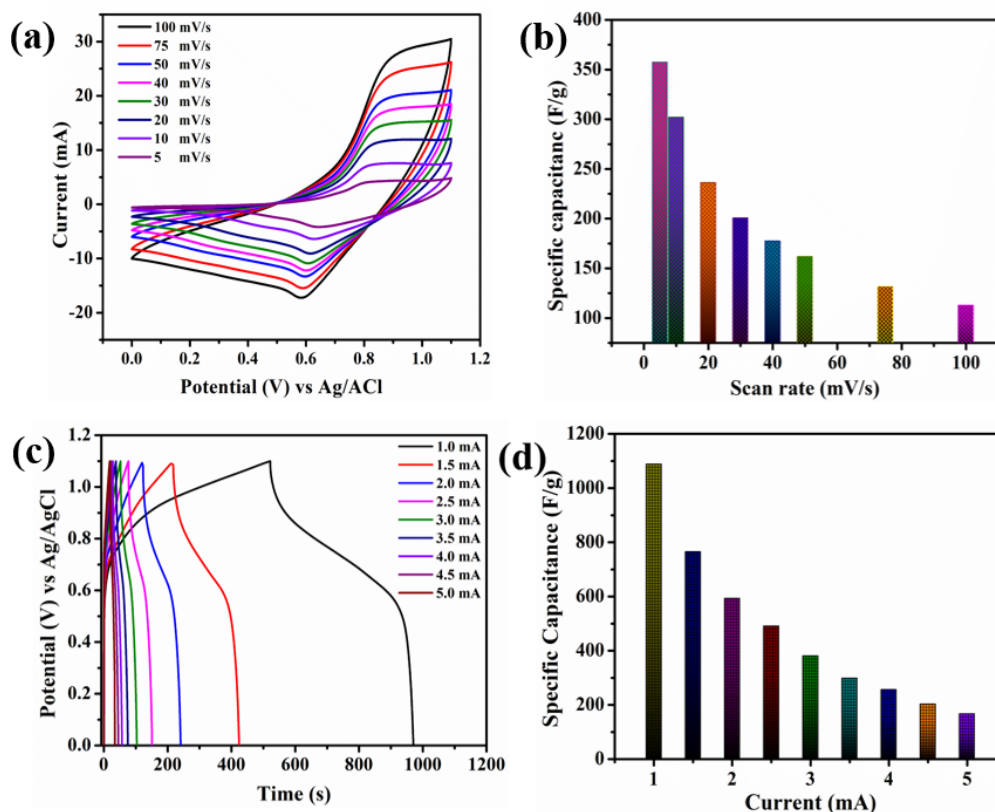

**Figure S12** Electrochemical analysis of prepared NiSb<sub>2</sub>O<sub>6</sub>-rGO (90:10) composite (a) cyclic voltammetric curve for different scan rates (from 100 mV/s to 5 mV/s), (b) specific capacitance vs. scan rate curve calculated from CV profile, (c) charge-discharge curve at different applied currents (from 1 mA to 5 mA), and (d) specific capacitance vs. applied current curve calculated from CD profile.

**Figure S13(a)** shows the cyclic voltammetry curve for the NiSb<sub>2</sub>O<sub>6</sub>-rGO (85:15) at the different scan rates varying from 5 mV/s to 100 mV/s. **Figure S13(b)** represents the plot for the effect of specific capacitance on scan rates. The maximum specific capacitance of around 95 F/g is obtained at a scan rate of 5 mV/s. **Figure S13(c)** shows the charge-discharge profile for the NiSb<sub>2</sub>O<sub>6</sub>-rGO (85:15) at different applied current values (from 1 mA to 5 mA). A maximum specific capacitance of around 250 F/g at the current density of 1 A/g is obtained for the NiSb<sub>2</sub>O<sub>6</sub>-rGO (85:15) electrode as shown in **Figure S13(d)**.

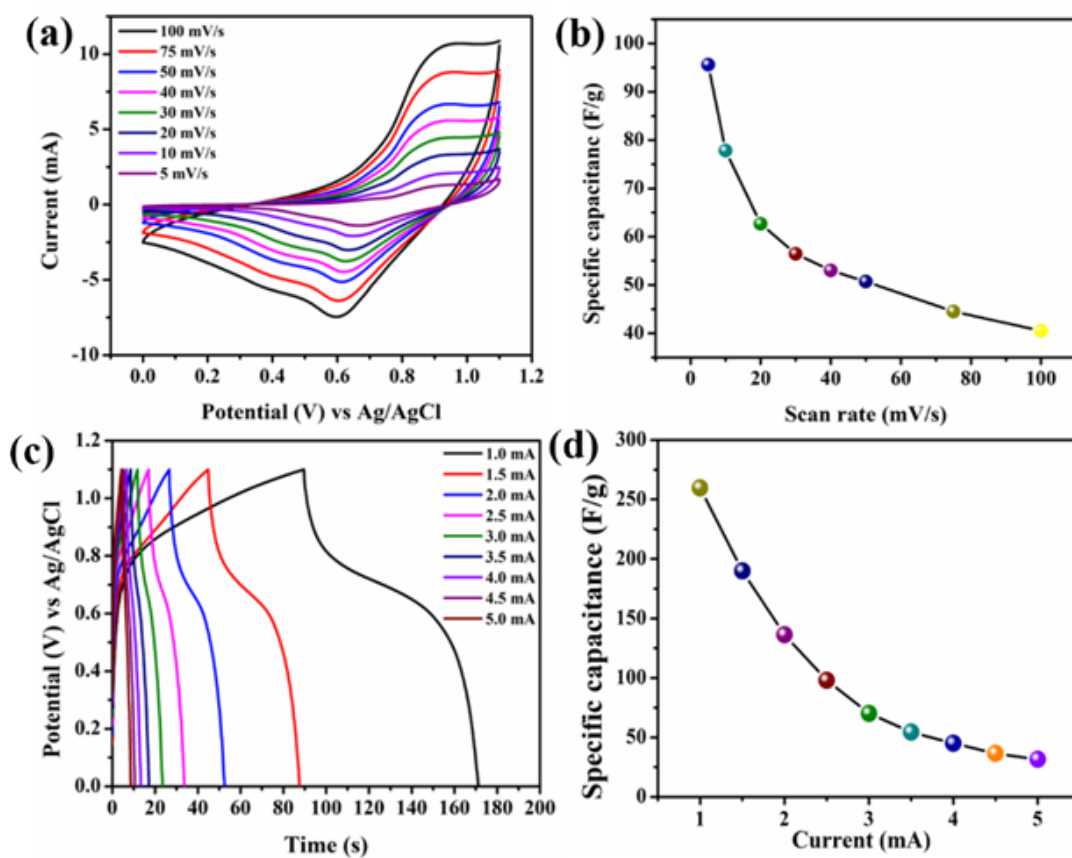

**Figure S13.** Electrochemical analysis of prepared NiSb<sub>2</sub>O<sub>6</sub>-rGO (85:15) composite (a) cyclic voltammetric curve for different scan rates (from 100 mV/s to 5 mV/s), (b) specific capacitance vs. scan rate curve calculated from CV profile, (c) charge-discharge curve at different applied currents (from 1 mA to 5 mA), and (d) specific capacitance vs. applied current curve calculated from CD profile.

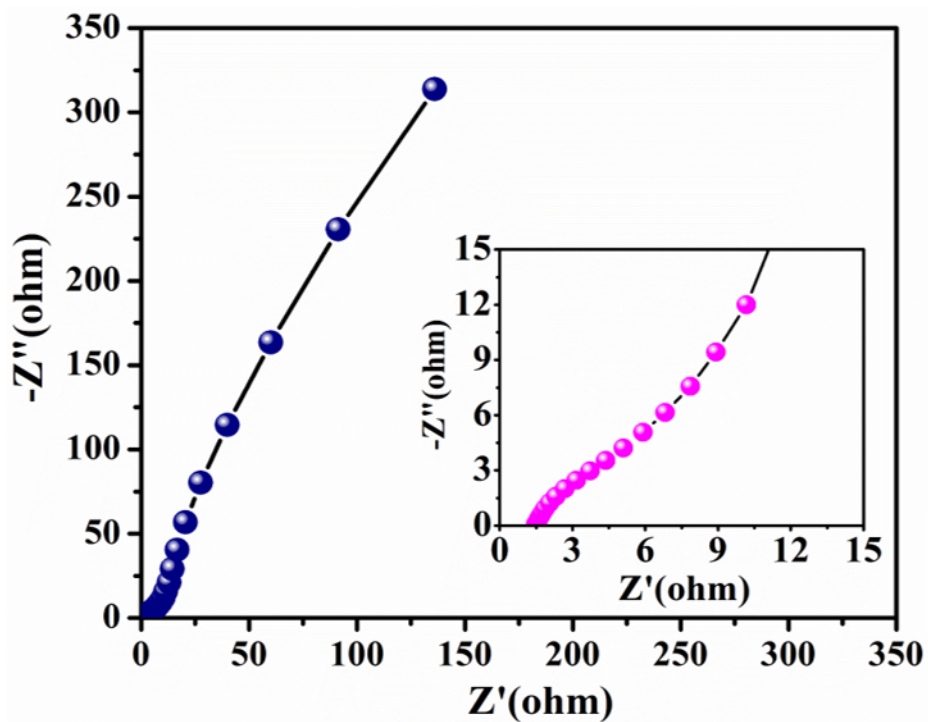

**Figure S14** Nyquist plot, showing the impedance characteristic of the NiSb<sub>2</sub>O<sub>6</sub>-reduced graphene oxide composite symmetric cell device, with an expanded view shown in the inset.

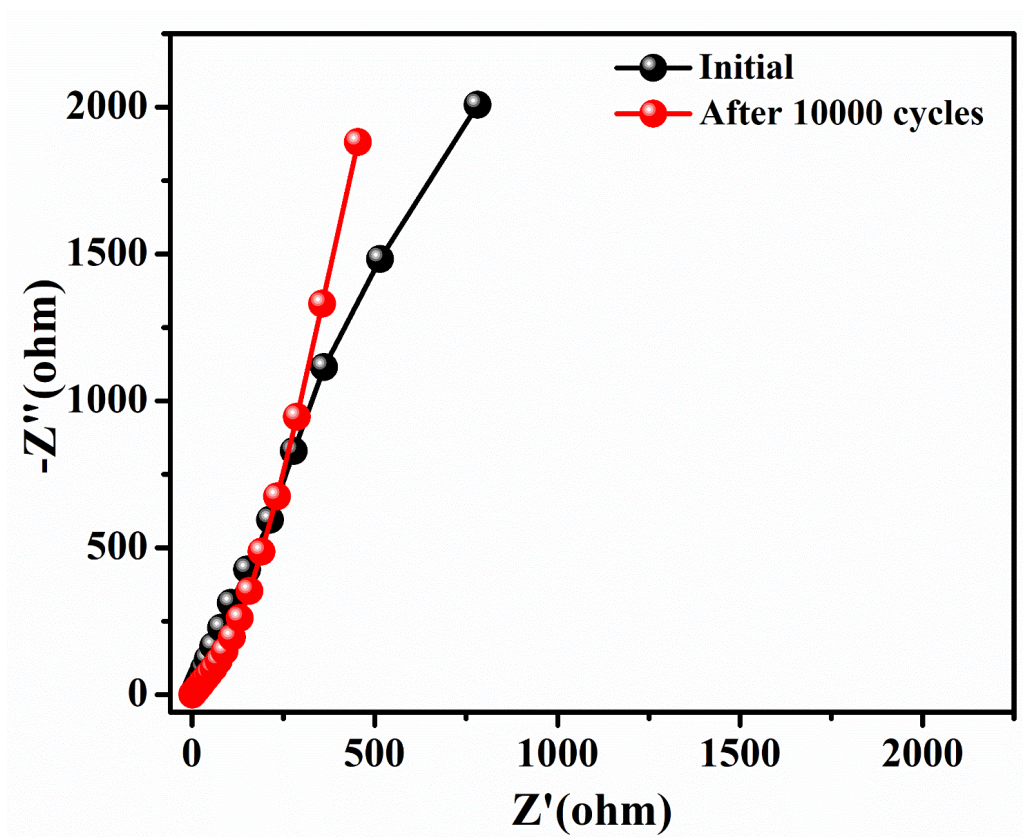

**Figure S15** Nyquist plots comparison for NiSb<sub>2</sub>O<sub>6</sub>-reduced graphene oxide composite symmetric cell device, taken during the initial phase and following the cyclic stability test.



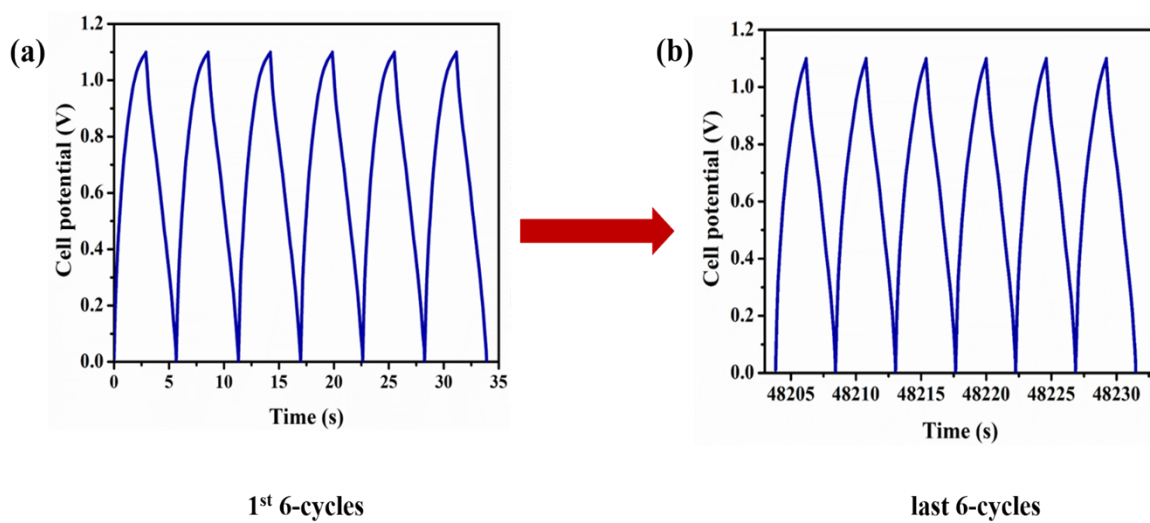

**Figure S16** The first six and final six cycles of NiSb<sub>2</sub>O<sub>6</sub>-reduced graphene oxide composite symmetric cell device, obtained from the cyclic stability test.

**Table S1:** Review of the supercapacitive performances of the NiSb<sub>2</sub>O<sub>6</sub>-reduced graphene oxide composite electrode and other released research for supercapacitor electrodes, as evaluated utilizing the three-electrode system.

| <b>Sr no.</b> | <b>Material name</b>                     | <b>Preparation Methods</b>   | <b>Specific capacitance (F/g)</b> | <b>References</b> |
|---------------|------------------------------------------|------------------------------|-----------------------------------|-------------------|
| 1.            | RuSbO-G                                  | Microwave-assisted method    | 236                               | [1]               |
| 2.            | Cu <sub>3</sub> SbS <sub>4</sub>         | Facial one-pot hydrothermal  | 41.785                            | [2]               |
| 3.            | Fe <sub>3</sub> O <sub>4</sub> -graphene | Hydrothermal                 | 81                                | [3]               |
| 4.            | ZnO-graphene                             | Sol-gel                      | 95                                | [4]               |
| 5.            | ZnO-graphene                             | Microwave technique          | 109                               | [5]               |
| 6.            | CuO                                      | Wet Chemical method          | 88.5                              | [6]               |
| 7.            | FeMoS <sub>2</sub> -graphene             | Hydrothermal                 | 135                               | [7]               |
| 8.            | ZnSb <sub>2</sub> O <sub>6</sub>         | Precipitation method         | 140.8                             | [8]               |
| 9.            | RGOSb                                    | Modifies Staudenmaier method | 289                               | [9]               |
| 10.           | NiO-rGO                                  | Hydrothermal                 | 171.3                             | [10]              |
| 11.           | NiO                                      | Hydrothermal                 | 137.7                             | [11]              |
| 12.           | Sb-SnO <sub>2</sub>                      | Facile co-precipitation      | 158.2                             | [12]              |
| <b>13.</b>    | <b>NiSb<sub>2</sub>O<sub>6</sub>-rGO</b> | <b>Solid-State</b>           | <b>952.38</b>                     | <b>This Work</b>  |

## Reference:

- [1] P. Ekwere *et al.*, “High stability asymmetric supercapacitor cell developed with novel microwave-synthesized graphene-stabilized ruthenium antimonide nanomaterial,” *J. Energy Storage*, vol. 63, no. February, p. 106853, 2023, doi: 10.1016/j.est.2023.106853.
- [2] V. K. Mariappan, K. Krishnamoorthy, P. Pazhamalai, S. Sahoo, and S. J. Kim, “Layered famatinite nanoplates as an advanced pseudocapacitive electrode material for supercapacitor applications,” *Electrochim. Acta*, vol. 275, pp. 110–118, 2018, doi: 10.1016/j.electacta.2018.04.126.
- [3] Z. Song, W. Liu, P. Xiao, Z. Zhao, G. Liu, and J. Qiu, “Nano-iron oxide (Fe<sub>2</sub>O<sub>3</sub>)/three-dimensional graphene aerogel composite as supercapacitor electrode materials with extremely wide working potential window,” *Mater. Lett.*, vol. 145, pp. 44–47, 2015, doi: 10.1016/j.matlet.2015.01.040.
- [4] I. Y. Y. Bu and R. Huang, “One-pot synthesis of ZnO/reduced graphene oxide nanocomposite for supercapacitor applications,” *Mater. Sci. Semicond. Process.*, vol. 31, pp. 131–138, 2015, doi: 10.1016/j.mssp.2014.11.037.
- [5] A. Ramados and S. J. Kim, “Facile preparation and electrochemical characterization of graphene/ZnO nanocomposite for supercapacitor applications,” *Mater. Chem. Phys.*, vol. 140, no. 1, pp. 405–411, 2013, doi: 10.1016/j.matchemphys.2013.03.057.
- [6] Y. X. Zhang, M. Huang, F. Li, and Z. Q. Wen, “Controlled synthesis of hierarchical CuO nanostructures for electrochemical capacitor electrodes,” *Int. J. Electrochem. Sci.*, vol. 8, no. 6, pp. 8645–8661, 2013, doi: 10.1016/s1452-3981(23)12916-6.
- [7] Y. Wang, P. He, W. Lei, F. Dong, and T. Zhang, “Novel FeMoO<sub>4</sub>/graphene composites based electrode materials for supercapacitors,” *Compos. Sci. Technol.*, vol. 103, pp. 16–21, 2014, doi: 10.1016/j.compscitech.2014.08.009.

- [8] M. Balasubramaniam and S. Balakumar, "Exploration of electrochemical properties of zinc antimonate nanoparticles as supercapacitor electrode material," *Mater. Sci. Semicond. Process.*, vol. 56, no. August, pp. 287–294, 2016, doi: 10.1016/j.mssp.2016.09.014.
- [9] M. Ciszewski, A. Mianowski, G. Nawrat, and P. Szatkowski, "Reduced Graphene Oxide Supported Antimony Species for High-Performance Supercapacitor Electrodes," *ISRN Electrochem.*, vol. 2014, pp. 1–7, 2014, doi: 10.1155/2014/826832.
- [10] J. Xu *et al.*, "NiO-rGO composite for supercapacitor electrode," *Surfaces and Interfaces*, vol. 18, no. December 2019, 2020, doi: 10.1016/j.surfin.2019.100420.
- [11] Y. zhen Zheng, H. yang Ding, and M. lin Zhang, "Preparation and electrochemical properties of nickel oxide as a supercapacitor electrode material," *Mater. Res. Bull.*, vol. 44, no. 2, pp. 403–407, 2009, doi: 10.1016/j.materresbull.2008.05.002.
- [12] J. Zhang, Y. Sun, and J. Xu, "Fabrication of antimony doped tin oxide nanopowders as an advanced electrode material for supercapacitors," *Micro Nano Lett.*, vol. 14, no. 3, pp. 254–258, 2019, doi: 10.1049/mnl.2018.5212.
